## Corrigendum

### Barents Sea cod (*Gadus morhua*) diet composition: long-term interannual, seasonal, and ontogenetic patterns

Rebecca E. Holt <sup>1\*</sup>, Bjarte Bogstad<sup>2</sup>, Joël M. Durant <sup>1</sup>, Andrey V. Dolgov<sup>3</sup>, and Geir Ottersen<sup>1,2</sup>

<sup>1</sup>Centre for Ecological and Evolutionary Synthesis, Department of Biosciences, University of Oslo, P.O. Box 1066 Blindern, Oslo 0316, Norway

<sup>2</sup>Institute of Marine Research, P.O. Box 1870 Nordnes, Bergen 5817, Norway

<sup>3</sup>Russian Federal Research Institute of Fisheries and Oceanography (VNIRO), Polar branch of VNIRO (PINRO named after N.M. Knipovich), 6, Akademika Knipovicha Street, Murmansk 183038, Russia

\*Corresponding author: tel: (+47) 22 85 44 00; e-mail: [r.e.holt@ibv.uio.no](mailto:r.e.holt@ibv.uio.no).

Holt, R. E., Bogstad, B., Durant, J. M., Dolgov, A. V. and Ottersen, G. Barents Sea cod (*Gadus morhua*) diet composition: long-term interannual, seasonal, and ontogenetic patterns. – ICES Journal of Marine Science, 76: 1936.

Advance access publication 24 June 2019.

In the original version of this article, Andrey V. Dolgov was mistakenly omitted as an author; this has now been corrected. The authors would like to apologize for this error.
